# Supplementary material for: A Summary Report from the Research Partnership on Women in Science Careers
Source: Springer Nature journal article supplement (doi:10.1007/s11606-018-4547-y), 2018-07-12
Supplement: MOESM1 [file 15948980]

**Appendix 1: List of Research Partnership PIs/Co-PIs**

Molly Carnes

Deborah Helitzer

Amparo Villablanca

Wendy Williams

Donna Ginther

Shulamit Kahn

Thomas Diprete

Jennifer Glass

Sharon Sassler

Yael Levitte

Joan Reede

Elizabeth Travis

Phyllis Carr

Karen Freund

Richard McGee

Stephanie Abbhul

Jeane Ann Grisso

Reshma Jagsi

Donna Nelson

Emorcia Hill

Michelle Hebl

Virginia Valian

Lydia Howell
